# Supplementary figures and images for: Older Women Who Practiced Physical Exercises before the COVID-19 Pandemic Present Metabolic Alterations and Worsened Functional Physical Capacity after One Year of Social Isolation
Source: MDPI journal article supplement (doi:10.3390/healthcare10091736), 2022-09-09

## Timed get up and go test (TUGT)

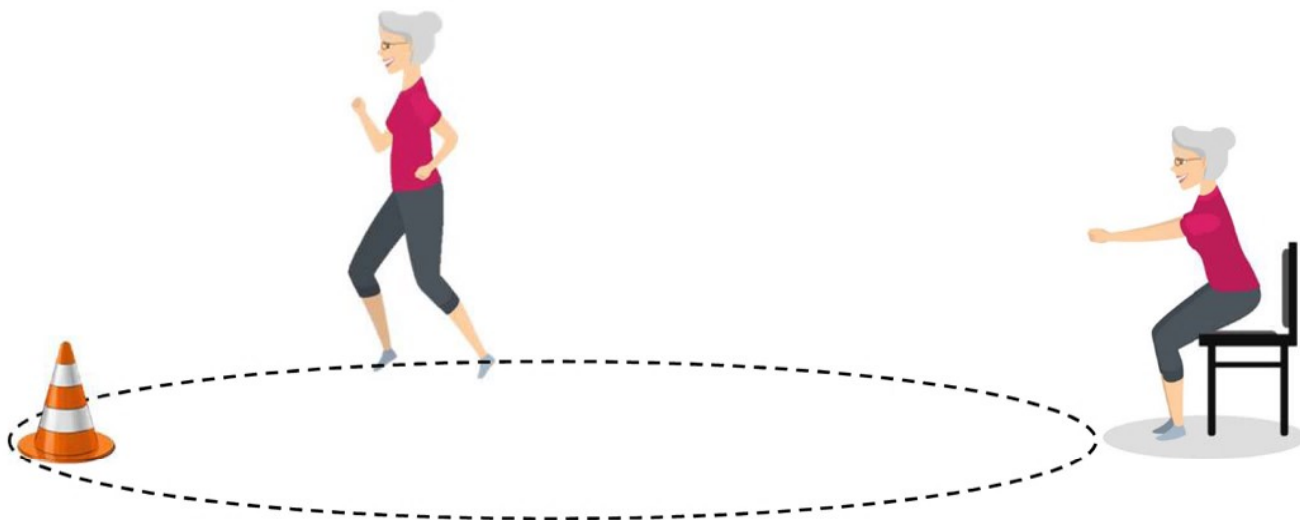

## Handgrip

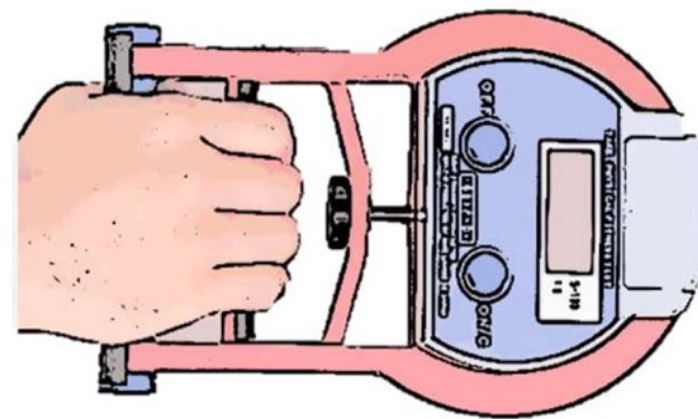

## Gait speed (GS)

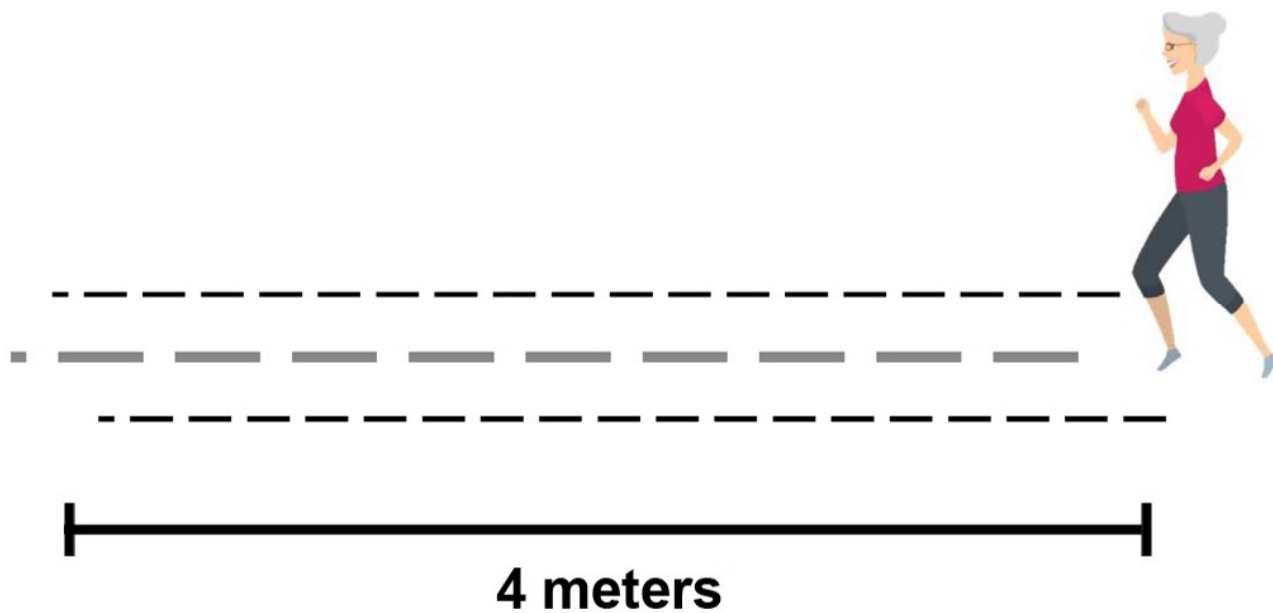

Supplement: s1 [file s1]
